# Supplementary material
Source: PubMed Central journal article supplement (PMC5838610)
Supplement: jamainternmed-178-196-s001.pdf [file jamainternmed-178-196-s001.pdf]

## Supplementary Online Content

Goodwin JS, Salameh H, Zhou J, Singh S, Kuo Y-F, Nattinger AB. Association of hospitalist years of experience with mortality in the hospitalized medicare population. *JAMA Intern Med*. Published online December 26, 2017. doi:10.1001/jamainternmed.2017.7049

**eTable 1.** Association of patient and hospital characteristics with the year of experience of hospitalists for all hospitalizations cared for by 3,860 physicians during their first four years working as hospitalists.

**eTable 2.** Mortality in the 30 days after admission, and hospital mortality, as a function of the number of years of experience of 2,027 hospitalists who practiced in the same hospital for four years, adjusted for patient and hospital characteristics, in a three level model.

**eTable 3.** Mortality in the 30 days after admission, and hospital mortality, as a function of the number of years of experience of the 2,026 hospitalists who practiced in the same hospital over their first four years, adjusted for patient and hospital characteristics, and limited to patients with a medial DRG.

This supplementary material has been provided by the authors to give readers additional information about their work.

**Online eTable 1.** Association of patient and hospital characteristics with the year of experience of hospitalists for all hospitalizations cared for by 3,860 physicians during their first four years working as hospitalists.

|                                                                                           | All<br>N (%) or Mean<br>(SD) | Hospitalist experience |                    |                   |                    | p-value |
|-------------------------------------------------------------------------------------------|------------------------------|------------------------|--------------------|-------------------|--------------------|---------|
|                                                                                           |                              | First<br>N=18,364      | Second<br>N=22,260 | Third<br>N=22,400 | Fourth<br>N=20,807 |         |
| Age                                                                                       | 80.51 (7.96)                 | 80.31 (7.88)           | 80.56 (7.92)       | 80.55 (7.96)      | 80.57 (8.07)       | 0.0030  |
| Gender                                                                                    |                              |                        |                    |                   |                    | 0.0241  |
| Male                                                                                      | 29,770 (35.51%)              | 6,617 (36.03%)         | 7,741 (34.78%)     | 7,929 (35.40%)    | 7,483 (35.96%)     |         |
| Female                                                                                    | 54,061 (64.49%)              | 11,747 (63.97%)        | 14,519 (65.22%)    | 14,471 (64.60%)   | 13,324 (64.04%)    |         |
| Medicaid eligible                                                                         |                              |                        |                    |                   |                    | 0.2527  |
| No                                                                                        | 65,096 (77.65%)              | 14,337 (78.07%)        | 17,217 (77.35%)    | 17,346 (77.44%)   | 16,196 (77.84%)    |         |
| Yes                                                                                       | 18,735 (22.35%)              | 4,027 (21.93%)         | 5,043 (22.65%)     | 5,054 (22.56%)    | 4,611 (22.16%)     |         |
| Length of stay in hospitalization                                                         | 5.83 (4.02)                  | 5.99 (4.29)            | 5.87 (4.22)        | 5.77 (3.84)       | 5.71 (3.75)        | <0.0001 |
| Number of hospitalizations in 12 months before admission                                  | 1.25 (1.73)                  | 1.26 (1.74)            | 1.28 (1.76)        | 1.25 (1.73)       | 1.21 (1.71)        | 0.0001  |
| DRG weight                                                                                | 1.58 (1.18)                  | 1.57 (1.20)            | 1.58 (1.18)        | 1.57 (1.16)       | 1.59 (1.19)        | 0.1673  |
| Number of comorbidities                                                                   | 4.79 (3.42)                  | 4.45 (3.16)            | 4.72 (3.32)        | 4.90 (3.50)       | 5.05 (3.62)        | <0.0001 |
| Race                                                                                      |                              |                        |                    |                   |                    | 0.0028  |
| White                                                                                     | 71,803 (85.65%)              | 15,877 (86.46%)        | 19,032 (85.50%)    | 19,131 (85.41%)   | 17,763 (85.37%)    |         |
| Black                                                                                     | 7,050 (8.41%)                | 1,465 (7.98%)          | 1,859 (8.35%)      | 1,963 (8.76%)     | 1,763 (8.47%)      |         |
| Hispanic                                                                                  | 3,173 (3.78%)                | 670 (3.65%)            | 898 (4.03%)        | 798 (3.56%)       | 807 (3.88%)        |         |
| Other                                                                                     | 1,805 (2.15%)                | 352 (1.92%)            | 471 (2.12%)        | 508 (2.27%)       | 474 (2.28%)        |         |
| Education (Percent of persons in zip code 25+ years with high school education or higher) | 86.37 (8.55)                 | 86.28 (8.63)           | 86.25 (8.59)       | 86.49 (8.44)      | 86.46 (8.57)       | 0.0034  |
| DRG type                                                                                  |                              |                        |                    |                   |                    | 0.1308  |
| Medical                                                                                   | 66,203 (78.97%)              | 14,528 (79.11%)        | 17,458 (78.43%)    | 17,757 (79.27%)   | 16,460 (79.11%)    |         |
| Surgical                                                                                  | 17,628 (21.03%)              | 3,836 (20.89%)         | 4,802 (21.57%)     | 4,643 (20.73%)    | 4,347 (20.89%)     |         |
| Residence prior to hospitalization                                                        |                              |                        |                    |                   |                    | <0.0001 |
| Community                                                                                 | 75,151 (89.65%)              | 16,588 (90.33%)        | 20,015 (89.91%)    | 19,887 (88.78%)   | 18,661 (89.69%)    |         |
| Nursing facility and other institutions                                                   | 8,680 (10.35%)               | 1,776 (9.67%)          | 2,245 (10.09%)     | 2,513 (11.22%)    | 2,146 (10.31%)     |         |
| Bed Size                                                                                  |                              |                        |                    |                   |                    | 0.0129  |
| > 500                                                                                     | 21,189 (25.28%)              | 4,726 (25.74%)         | 5,581 (25.07%)     | 5,657 (25.25%)    | 5,225 (25.11%)     |         |

|                            |                 |                 |                 |                 |                 |         |
|----------------------------|-----------------|-----------------|-----------------|-----------------|-----------------|---------|
| 350 <, <= 500              | 15,343 (18.30%) | 3,268 (17.80%)  | 4,005 (17.99%)  | 4,239 (18.92%)  | 3,831 (18.41%)  |         |
| 200 <, <= 350              | 24,536 (29.27%) | 5,312 (28.93%)  | 6,511 (29.25%)  | 6,501 (29.02%)  | 6,212 (29.86%)  |         |
| <= 200                     | 22,763 (27.15%) | 5,058 (27.54%)  | 6,163 (27.69%)  | 6,003 (26.80%)  | 5,539 (26.62%)  |         |
| Urban/Rural Indicator      |                 |                 |                 |                 |                 | 0.3596  |
| Rural                      | 12,739 (15.20%) | 2,724 (14.83%)  | 3,367 (15.13%)  | 3,439 (15.35%)  | 3,209 (15.42%)  |         |
| Urban                      | 71,092 (84.80%) | 15,640 (85.17%) | 18,893 (84.87%) | 18,961 (84.65%) | 17,598 (84.58%) |         |
| Type of provider           |                 |                 |                 |                 |                 | <0.0001 |
| For profit                 | 11,849 (14.13%) | 2,409 (13.12%)  | 3,191 (14.34%)  | 3,258 (14.54%)  | 2,991 (14.37%)  |         |
| Government                 | 9,714 (11.59%)  | 2,020 (11.00%)  | 2,535 (11.39%)  | 2,636 (11.77%)  | 2,523 (12.13%)  |         |
| Nonprofit                  | 62,268 (74.28%) | 13,935 (75.88%) | 16,534 (74.28%) | 16,506 (73.69%) | 15,293 (73.50%) |         |
| Medical School Affiliation |                 |                 |                 |                 |                 | <0.0001 |
| Major                      | 16,213 (19.34%) | 3,731 (20.32%)  | 4,278 (19.22%)  | 4,330 (19.33%)  | 3,874 (18.62%)  |         |
| Limited                    | 15,211 (18.14%) | 3,281 (17.87%)  | 4,089 (18.37%)  | 4,025 (17.97%)  | 3,816 (18.34%)  |         |
| Graduate                   | 4,922 (5.87%)   | 1,203 (6.55%)   | 1,307 (5.87%)   | 1,244 (5.55%)   | 1,168 (5.61%)   |         |
| No affiliation             | 47,485 (56.64%) | 10,149 (55.27%) | 12,586 (56.54%) | 12,801 (57.15%) | 11,949 (57.43%) |         |

Abbreviations: SD, standard; DRG, Diagnosis-Related Group.

**Online eTable 2.** Mortality in the 30 days after admission, and hospital mortality, as a function of the number of years of experience of 2,027 hospitalists who practiced in the same hospital for four years, adjusted for patient and hospital characteristics, in a three level model. .

| Characteristics                                                                                         | N (%) or Mean (SD) | 30 day mortality rate post hospital admission |                                  | Hospital mortality rate |                                  |
|---------------------------------------------------------------------------------------------------------|--------------------|-----------------------------------------------|----------------------------------|-------------------------|----------------------------------|
|                                                                                                         |                    | Observed rate                                 | Odds Ratio <sup>a</sup> (95% CI) | Observed rate           | Odds Ratio <sup>a</sup> (95% CI) |
| All                                                                                                     | 42,868             | 10.18%                                        |                                  | 3.15%                   |                                  |
| Age (Per year)                                                                                          | 80.5 (7.98)        | 10.18%                                        | 1.05 (1.05-1.06)                 | 3.15%                   | 1.03 (1.02-1.04)                 |
| Gender                                                                                                  |                    |                                               |                                  |                         |                                  |
| Female                                                                                                  | 27,629 (64.45%)    | 9.50%                                         | Reference                        | 2.84%                   | Reference                        |
| Male                                                                                                    | 15,239 (35.55%)    | 11.42%                                        | 1.21 (1.12 -1.30)                | 3.70%                   | 1.17 (1.03-1.32)                 |
| Medicaid eligible                                                                                       |                    |                                               |                                  |                         |                                  |
| No                                                                                                      | 33,358 (77.82%)    | 10.16%                                        | Reference                        | 3.16%                   | Reference                        |
| Yes                                                                                                     | 9,510 (22.18%)     | 10.26%                                        | 0.99 (0.91-1.09)                 | 3.12%                   | 0.92 (0.80-1.07)                 |
| Education (Percent of persons in zip code 25+ years with high school education or higher) (Per percent) | 86.5 (8.34)        | 10.18%                                        | 0.99 (0.99-1.01)                 | 3.15%                   | 0.99 (0.98-0.99)                 |
| Number of hospitalizations in 12 months before admission (Per hospitalization)                          | 1.3 (1.71)         | 10.18%                                        | 0.96 (0.93-0.99)                 | 3.15%                   | 0.95 (0.91-0.99)                 |
| Race                                                                                                    |                    |                                               |                                  |                         |                                  |
| White                                                                                                   | 36,982 (86.27%)    | 10.33%                                        | Reference                        | 3.17%                   | Reference                        |
| Black                                                                                                   | 3,595 (8.39%)      | 9.35%                                         | 0.87 (0.77-0.99)                 | 3.09%                   | 0.96 (0.77-1.19)                 |
| Hispanic                                                                                                | 1,347 (3.14%)      | 8.31%                                         | 0.85 (0.68-1.06)                 | 2.67%                   | 0.86 (0.60-1.25)                 |
| Other                                                                                                   | 944 (2.20%)        | 10.17%                                        | 1.01 (0.80-1.26)                 | 3.28%                   | 1.02 (0.70-1.48)                 |
| DRG type                                                                                                |                    |                                               |                                  |                         |                                  |
| Medical                                                                                                 | 33,996 (79.30%)    | 11.45%                                        | Reference                        | 3.40%                   | Reference                        |
| Surgical                                                                                                | 8,872 (20.70%)     | 5.31%                                         | 0.72 (0.64-0.81)                 | 2.19%                   | 1.16 (0.97-1.40)                 |
| Residence prior to hospitalization                                                                      |                    |                                               |                                  |                         |                                  |
| Community                                                                                               | 38,441 (89.67%)    | 9.51%                                         | Reference                        | 2.89%                   | Reference                        |
| Nursing facility and other institutions                                                                 | 4,427 (10.33%)     | 16.02%                                        | 1.67 (1.52-1.84)                 | 5.42%                   | 1.69 (1.45-1.97)                 |
| Bed Size                                                                                                |                    |                                               |                                  |                         |                                  |

|                            |                 |        |                  |       |                  |
|----------------------------|-----------------|--------|------------------|-------|------------------|
| > 500                      | 11,471 (26.76%) | 9.84%  | Reference        | 3.29% | Reference        |
| 350 <, <= 500              | 8,351 (19.48%)  | 10.26% | 1.03 (0.92-1.16) | 3.22% | 0.95 (0.78-1.15) |
| 200 <, <= 350              | 12,572 (29.33%) | 10.08% | 0.99 (0.89-1.11) | 3.17% | 0.94 (0.78-1.13) |
| <= 200                     | 10,474 (24.43%) | 10.62% | 1.07 (0.93-1.21) | 2.92% | 0.84 (0.67-1.04) |
| Urban/Rural Indicator      |                 |        |                  |       |                  |
| Rural                      | 7,118 (16.60%)  | 10.75% | Reference        | 3.46% | Reference        |
| Urban                      | 35,750 (83.40%) | 10.07% | 0.97 (0.87-1.08) | 3.09% | 0.85 (0.71-1.03) |
| Type of provider           |                 |        |                  |       |                  |
| For profit                 | 4,704 (10.97%)  | 9.95%  | Reference        | 2.81% | Reference        |
| Government                 | 4,760 (11.10%)  | 10.97% | 1.02 (0.87-1.20) | 3.59% | 1.18 (0.90-1.54) |
| Nonprofit                  | 33,404 (77.92%) | 10.10% | 0.94 (0.83-1.06) | 3.13% | 1.04 (0.84-1.28) |
| Medical School Affiliation |                 |        |                  |       |                  |
| Major                      | 9,521 (22.21%)  | 9.47%  | Reference        | 3.07% | Reference        |
| Limited                    | 8,310 (19.39%)  | 10.41% | 1.17 (1.04-1.32) | 3.21% | 1.12 (0.91-1.36) |
| Graduate                   | 2,509 (5.85%)   | 12.16% | 1.36 (1.16-1.62) | 4.15% | 1.44 (1.10-1.88) |
| No affiliation             | 22,528 (52.55%) | 10.18% | 1.11 (1.01-1.25) | 3.05% | 1.09 (0.90-1.31) |
| Hospitalist experience     |                 |        |                  |       |                  |
| First year                 | 9,525 (22.22%)  | 10.49% | Reference        | 3.45% | Reference        |
| Second year                | 11,481 (26.78%) | 9.87%  | 0.88 (0.81-0.97) | 3.07% | 0.85 (0.72-0.99) |
| Third year                 | 11,410 (26.62%) | 10.07% | 0.89 (0.81-0.98) | 3.29% | 0.88 (0.75-1.03) |
| Forth year                 | 10,452 (24.38%) | 10.37% | 0.90 (0.82-0.99) | 2.80% | 0.74 (0.63-0.87) |

Abbreviations: SD standard; DRG, Diagnosis-Related Group.

<sup>a</sup> Odds ratio are from a multilevel model adjusted for all characteristics presented in the table, as well as patients' comorbidities and Diagnosis Related Group-Major Diagnostic Category (DRG-MDC).

**Online eTable 3.** Mortality in the 30 days after admission, and hospital mortality, as a function of the number of years of experience of the 2,026 hospitalists who practiced in the same hospital over their first four years, adjusted for patient and hospital characteristics, and limited to patients with a medial DRG.

| Characteristics                                                                                         | N (%) or Mean (SD) | 30 day mortality rate post hospital admission |                                  | Hospital mortality rate |                     |
|---------------------------------------------------------------------------------------------------------|--------------------|-----------------------------------------------|----------------------------------|-------------------------|---------------------|
|                                                                                                         |                    | Observed rate                                 | Odds Ratio <sup>a</sup> (95% CI) | Observed rate           | Odds Ratio (95% CI) |
| All                                                                                                     | 33,996             | 11.45%                                        |                                  | 3.40%                   |                     |
| Age (Per year)                                                                                          | 80.9 (8.01)        | 11.45%                                        | 1.05 (1.05-1.06)                 | 3.40%                   | 1.03 (1.02-1.04)    |
| Gender                                                                                                  |                    |                                               |                                  |                         |                     |
| Female                                                                                                  | 21,849 (64.27%)    | 10.69%                                        | Reference                        | 3.08%                   | Reference           |
| Male                                                                                                    | 12,147 (35.73%)    | 12.83%                                        | 1.21 (1.12 -1.31)                | 3.98%                   | 1.19 (1.05-1.36)    |
| Medicaid eligible                                                                                       |                    |                                               |                                  |                         |                     |
| No                                                                                                      | 26,070 (76.69%)    | 11.60%                                        | Reference                        | 3.47%                   | Reference           |
| Yes                                                                                                     | 7,926 (23.31%)     | 10.96%                                        | 0.96 (0.87-1.05)                 | 3.18%                   | 0.87 (0.74-1.03)    |
| Education (Percent of persons in zip code 25+ years with high school education or higher) (Per percent) | 86.4 (8.37)        | 11.45%                                        | 0.99 (0.99-1.01)                 | 3.40%                   | 0.99 (0.98-1.01)    |
| Number of hospitalizations in 12 months before admission (Per hospitalization)                          | 1.4 (1.78)         | 11.45%                                        | 0.96 (0.93-0.99)                 | 3.40%                   | 0.94 (0.89-0.99)    |
| Race                                                                                                    |                    |                                               |                                  |                         |                     |
| White                                                                                                   | 29,181 (85.84%)    | 11.67%                                        | Reference                        | 3.44%                   | Reference           |
| Black                                                                                                   | 3,021 (8.89%)      | 10.00%                                        | 0.88 (0.77-1.02)                 | 3.11%                   | 0.97 (0.77-1.23)    |
| Hispanic                                                                                                | 1,045 (3.07%)      | 9.57%                                         | 0.89 (0.71-1.13)                 | 3.06%                   | 0.98 (0.66-1.45)    |
| Other                                                                                                   | 749 (2.20%)        | 11.48%                                        | 1.02 (0.80-1.30)                 | 3.47%                   | 1.03 (0.69-1.56)    |
| Residence prior to hospitalization                                                                      |                    |                                               |                                  |                         |                     |
| Community                                                                                               | 30,547 (89.85%)    | 10.73%                                        | Reference                        | 3.13%                   | Reference           |
| Nursing facility and other institutions                                                                 | 3,449 (10.15%)     | 17.83%                                        | 1.70 (1.52-1.88)                 | 5.80%                   | 1.69 (1.43-2.01)    |
| Bed Size                                                                                                |                    |                                               |                                  |                         |                     |
| > 500                                                                                                   | 8,923 (26.25%)     | 11.03%                                        | Reference                        | 3.50%                   | Reference           |
| 350 <, <= 500                                                                                           | 6,488 (19.08%)     | 11.79%                                        | 1.05 (0.93-1.19)                 | 3.53%                   | 0.97 (0.79-1.20)    |
| 200 <, <= 350                                                                                           | 9,966 (29.32%)     | 11.20%                                        | 0.99 (0.88-1.12)                 | 3.31%                   | 0.91 (0.74-1.12)    |

|                            |                 |        |                  |       |                  |
|----------------------------|-----------------|--------|------------------|-------|------------------|
| <= 200                     | 8,619 (25.35%)  | 11.94% | 1.08 (0.94-1.24) | 3.31% | 0.90 (0.71-1.14) |
| Urban/Rural Indicator      |                 |        |                  |       |                  |
| Rural                      | 5,854 (17.22%)  | 12.03% | Reference        | 3.66% | Reference        |
| Urban                      | 28,142 (82.78%) | 11.34% | 0.94 (0.84-1.06) | 3.35% | 0.89 (0.72-1.08) |
| Type of provider           |                 |        |                  |       |                  |
| For profit                 | 3,649 (10.73%)  | 11.37% | Reference        | 3.12% | Reference        |
| Government                 | 3,872 (11.39%)  | 12.01% | 0.99 (0.84-1.18) | 3.67% | 1.07 (0.80-1.44) |
| Nonprofit                  | 26,475 (77.88%) | 11.38% | 0.94 (0.82-1.07) | 3.40% | 1.02 (0.81-1.29) |
| Medical School Affiliation |                 |        |                  |       |                  |
| Major                      | 7,465 (21.96%)  | 10.61% | Reference        | 3.30% | Reference        |
| Limited                    | 6,431 (18.92%)  | 11.88% | 1.20 (1.06-1.37) | 3.47% | 1.13 (0.91-1.40) |
| Graduate                   | 1,993 (5.86%)   | 13.50% | 1.37 (1.14-1.64) | 4.37% | 1.42 (1.05-1.91) |
| No affiliation             | 18,107 (53.26%) | 11.43% | 1.14 (1.01-1.29) | 3.31% | 1.08 (0.88-1.32) |
| Hospitalist experience     |                 |        |                  |       |                  |
| First year                 | 7,542 (22.18%)  | 11.84% | Reference        | 3.82% | Reference        |
| Second year                | 9,047 (26.61%)  | 11.20% | 0.88 (0.79-0.97) | 3.38% | 0.83 (0.70-0.99) |
| Third year                 | 9,050 (26.62%)  | 11.23% | 0.87 (0.78-0.96) | 3.50% | 0.84 (0.71-0.99) |
| Forth year                 | 8,357 (24.58%)  | 11.63% | 0.89 (0.81-0.99) | 2.93% | 0.68 (0.57-0.82) |

Abbreviations: SD, standard; DRG, Diagnosis-Related Group.

<sup>a</sup> Odds ratio are from a multilevel model adjusted for all characteristics presented in the table, as well as patients' comorbidities and Diagnosis Related Group-Major Diagnostic Category (DRG-MDC).
